# Supplementary material for: Isotope-assisted metabolic flux analysis as an equality-constrained nonlinear program for improved scalability and robustness
Source: PubMed Central journal article supplement (PMC8947808; doi:10.1371/journal.pcbi.1009831), 2022-03-24
Supplement: pcbi.1009831.s004.pdf [file pcbi.1009831.s004.pdf]

1 **Toy Network and *E. coli* Tandem Mass Spectrometry inst-MFA**  
 2 **Examples**

3

4 **Toy Network Model**

| TOY NETWORK   |                          |         |         |
|---------------|--------------------------|---------|---------|
| Reaction Name | Reaction Description     | Flux LB | Flux UB |
| v0            | → Axt (abc)              | 1.0     | 1.0     |
| v1            | Axt (abc) → A (abc)      | 0.0     | 1000.0  |
| v2            | A (abc) → C (a) + D (bc) | 0.0     | 1000.0  |
| v3            | C (a) + D (bc) → B (abc) | 0.0     | 1000.0  |
| v4            | A (abc) → E (ab) + F (c) | 0.0     | 1000.0  |
| v5            | E (ab) + F (c) → B (abc) | 0.0     | 1000.0  |
| v6.f          | A (abc) → B (abc)        | 0.0     | 1000.0  |
| v6.b          | B (abc) → A (abc)        | 0.0     | 1000.0  |
| v7            | B (abc) →                | 0.0     | 1000.0  |

5

6 **Toy Network Results**

7 Simulated measurements that were fit to the model are listed in **S1 Data**. All pool sizes were constrained  
 8 by a lower bound of 0.0001 and an upper bound of 10.0 when fitting the model. The time domain was  
 9 discretized by assigning time nodes at values of 0.0, 1.0, 2.0, 4.0, 8.0, and 20.0. The 5<sup>th</sup>-order Radau IIA  
 10 collocation method was used.

| Reaction Name | Actual Flux | Actual Exchange | Predicted Flux | Predicted Exchange |
|---------------|-------------|-----------------|----------------|--------------------|
| v0            | 1.000       |                 | 1.000          |                    |
| v1            | 1.000       |                 | 1.000          |                    |
| v2            | 0.700       |                 | 0.695          |                    |
| v3            | 0.700       |                 | 0.695          |                    |
| v4            | 0.100       |                 | 0.100          |                    |
| v5            | 0.100       |                 | 0.100          |                    |
| v6            | 0.200       | 0.800           | 0.205          | 0.775              |
| v7            | 1.000       |                 | 1.000          |                    |

11

| Metabolite Name | Actual Pool Size | Predicted Pool Size |
|-----------------|------------------|---------------------|
| A               | 1.000            | 1.003               |
| B               | 0.200            | 0.188               |
| C               | 5.000            | 5.010               |
| D               | 0.100            | 0.108               |
| E               | 0.500            | 0.502               |
| F               | 0.001            | 0.003               |

12

13

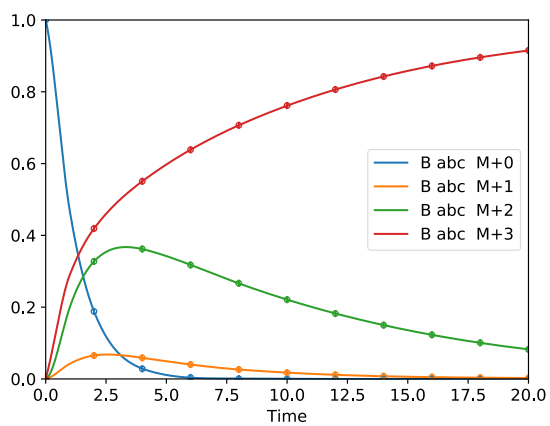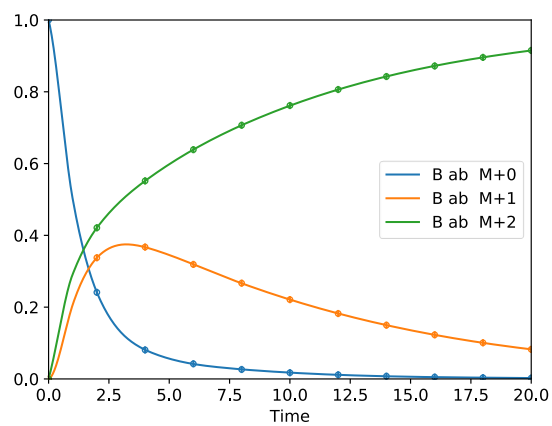

14

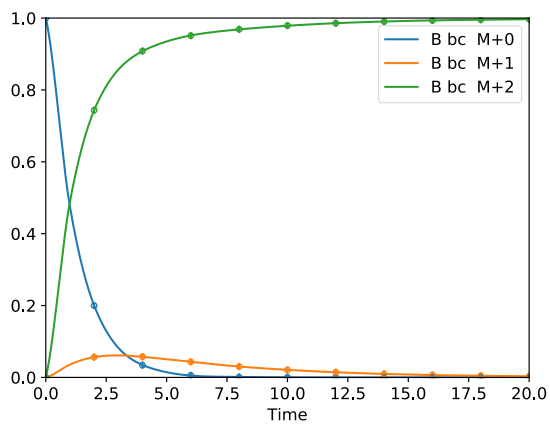

15

16 ***E. coli* Model**

17 The following *E. coli* metabolic flux analysis (MFA) network was adapted from that presented by Young et  
 18 al. [1]. For fitting the model, the pool size of each metabolite was given a lower bound of 0.001 and an  
 19 upper bound of 10.0. Confidence intervals were estimated by performing Monte Carlo simulations using  
 20 the measurement means and standard deviations.

21

**GLYCOLYSIS**

| Reaction Name | Reaction Description                  | Flux LB | Flux UB |
|---------------|---------------------------------------|---------|---------|
| gl-in:        | → Glc (abcdef)                        | 1.0     | 1.0     |
| gl-1:         | Glc (abcdef) → G6P (abcdef)           | 0.0     | 1000.0  |
| gl-2:         | G6P (abcdef) → F6P (abcdef)           | 0.0     | 1000.0  |
| gl-3.f:       | F6P (abcdef) → FBP (abcdef)           | 0.0     | 1000.0  |
| gl-3.b:       | FBP (abcdef) → F6P (abcdef)           | 0.0     | 1000.0  |
| gl-4.f:       | FBP (abcdef) → DHAP (cba) + GAP (def) | 0.0     | 1000.0  |
| gl-4.b:       | DHAP (cba) + GAP (def) → FBP (abcdef) | 0.0     | 1000.0  |
| gl-5.f:       | DHAP (abc) → GAP (abc)                | 0.0     | 1000.0  |
| gl-5.b:       | GAP (abc) → DHAP (abc)                | 0.0     | 1000.0  |
| gl-6.f:       | GAP (abc) → BPG (abc)                 | 0.0     | 1000.0  |
| gl-6.b:       | BPG (abc) → GAP (abc)                 | 0.0     | 1000.0  |
| gl-7.f:       | BPG (abc) → 3PG (abc)                 | 0.0     | 1000.0  |
| gl-7.b:       | 3PG (abc) → BPG (abc)                 | 0.0     | 1000.0  |
| gl-8.f:       | 3PG (abc) → PEP (abc)                 | 0.0     | 1000.0  |
| gl-8.b:       | PEP (abc) → 3PG (abc)                 | 0.0     | 1000.0  |
| gl-9          | PEP (abc) → Pyr (abc)                 | 0.0     | 1000.0  |

**PENTOSE PHOSPHATE PATHWAY**

| Reaction Name | Reaction Description                                  | Flux LB | Flux UB |
|---------------|-------------------------------------------------------|---------|---------|
| pp-1:         | G6P (abcdef) → 6PG (abcdef)                           | 0.0     | 1000.0  |
| pp-2:         | 6PG (abcdef) → Ru5P (bcdef) + CO <sub>2</sub> (a)     | 0.0     | 1000.0  |
| pp-3.f:       | Ru5P (abcde) → R5P (abcde)                            | 0.0     | 1000.0  |
| pp-3.b:       | R5P (abcde) → Ru5P (abcde)                            | 0.0     | 1000.0  |
| pp-4.f:       | Ru5P (abcde) → X5P (abcde)                            | 0.0     | 1000.0  |
| pp-4.b:       | X5P (abcde) → Ru5P (abcde)                            | 0.0     | 1000.0  |
| pp-5.f:       | R5P (cdefg) + X5P (abhij) → S7P (abcdefg) + GAP (hij) | 0.0     | 1000.0  |
| pp-5.b:       | S7P (abcdefg) + GAP (hij) → R5P (cdefg) + X5P (abhij) | 0.0     | 1000.0  |
| pp-6.f:       | GAP (def) + S7P (abcghij) → F6P (abcdef) + E4P (ghij) | 0.0     | 1000.0  |
| pp-6.b:       | F6P (abcdef) + E4P (ghij) → GAP (def) + S7P (abcghij) | 0.0     | 1000.0  |
| pp-7.f:       | X5P (abcde) + E4P (fghi) → GAP (cde) + F6P (abfghi)   | 0.0     | 1000.0  |
| pp-7.b:       | GAP (cde) + F6P (abfghi) → X5P (abcde) + E4P (fghi)   | 0.0     | 1000.0  |

**ENTNER-DOUDOROFF PATHWAY**

| Reaction Name | Reaction Description         | Flux LB | Flux UB |
|---------------|------------------------------|---------|---------|
| ed-1:         | 6PG (abcdef) → KDPG (abcdef) | 0.0     | 1000.0  |

|       |                                       |     |        |
|-------|---------------------------------------|-----|--------|
| ed-2: | KDPG (abcdef) → GAP (def) + Pyr (abc) | 0.0 | 1000.0 |
|-------|---------------------------------------|-----|--------|

### TCA CYCLE

| Reaction Name | Reaction Description                            | Flux LB | Flux UB |
|---------------|-------------------------------------------------|---------|---------|
| pd:           | Pyr (abc) → CO2 (a) + AcCoA (bc)                | 0.0     | 1000.0  |
| tc-1:         | OAA (abcd) + AcCoA (pq) → Cit (dcbqpa)          | 0.0     | 1000.0  |
| tc-2:         | Cit (abcdef) → iCit (abcdef)                    | 0.0     | 1000.0  |
| tc-3:         | iCit (abcdef) → aKG (abcde) + CO2 (f)           | 0.0     | 1000.0  |
| tc-4:         | aKG (abcde) → CO2 (a) + SucCoA (bcde)           | 0.0     | 1000.0  |
| tc-5:         | SucCoA (abcd) → 0.5 Suc (abcd) + 0.5 Suc (dcba) | 0.0     | 1000.0  |
| tc-6.f:       | Suc (abcd) → 0.5 Fum (abcd) + 0.5 Fum (dcba)    | 0.0     | 1000.0  |
| tc-6.b:       | Fum (abcd) → 0.5 Suc (abcd) + 0.5 Suc (dcba)    | 0.0     | 1000.0  |
| tc-7.f:       | Fum (abcd) → Mal (abcd)                         | 0.0     | 1000.0  |
| tc-7.b:       | Mal (abcd) → 0.5 Fum (abcd) + 0.5 Fum (dcba)    | 0.0     | 1000.0  |
| tc-8.f:       | Mal (abcd) → OAA (abcd)                         | 0.0     | 1000.0  |
| tc-8.b:       | OAA (abcd) → Mal (abcd)                         | 0.0     | 1000.0  |

### ANAPLEROTIC/CATAPLEROTIC REACTIONS

| Reaction Name | Reaction Description             | Flux LB | Flux UB |
|---------------|----------------------------------|---------|---------|
| me:           | Mal (abcd) → Pyr (abc) + CO2 (d) | 0.0     | 1000.0  |
| an.f:         | PEP (abc) + CO2 (d) → OAA (abcd) | 0.0     | 1000.0  |
| an.b:         | OAA (abcd) → PEP (abc) + CO2 (d) | 0.0     | 1000.0  |

### ACETATE SYNTHESIS

| Reaction Name | Reaction Description | Flux LB | Flux UB |
|---------------|----------------------|---------|---------|
| ac:           | AcCoA (ab) → Ac (ab) | 0.0     | 1000.0  |

### GLYOXYLATE SHUNT

| Reaction Name | Reaction Description                                       | Flux LB | Flux UB |
|---------------|------------------------------------------------------------|---------|---------|
| gx-1:         | iCit (abcdef) → Gox (ab) + 0.5 Suc (fcde) + 0.5 Suc (edcf) | 0.0     | 1000.0  |
| gx-2:         | Gox (ab) + AcCoA (cd) → Mal (abdc)                         | 0.0     | 1000.0  |

### ENTRY/EXIT FLUXES

| Reaction Name | Reaction Description | Flux LB | Flux UB |
|---------------|----------------------|---------|---------|
| co2-in.f:     | → CO2 (a)            | 0.0     | 1000.0  |
| co2-in.b:     | CO2 (a) →            | 0.0     | 1000.0  |
| ac-out:       | Ac (ab) →            | 0.0     | 1000.0  |

### AMINO ACID SYNTHESIS

| Reaction Name | Reaction Description                                                                                              | Flux LB | Flux UB |
|---------------|-------------------------------------------------------------------------------------------------------------------|---------|---------|
| glusyn:       | aKG (abcde) → Glu (abcde)                                                                                         | 0.0     | 1000.0  |
| glnsyn:       | Glu (abcde) → Gln (abcde)                                                                                         | 0.0     | 1000.0  |
| prosyn:       | Glu (abcde) → Pro (abcde)                                                                                         | 0.0     | 1000.0  |
| argsyn:       | Glu (abcde) + CO2 (f) + Gln (ghijk) + Asp (lmno) + AcCoA (pq) → Arg (abcdef) + aKG (ghijk) + Fum (lmno) + Ac (pq) | 0.0     | 1000.0  |
| aspsyn:       | OAA (abcd) + Glu (efghi) → Asp (abcd) + aKG (efghi)                                                               | 0.0     | 1000.0  |
| asnsyn:       | Asp (abcd) → Asn (abcd)                                                                                           | 0.0     | 1000.0  |

|            |                                                                                                                             |     |        |
|------------|-----------------------------------------------------------------------------------------------------------------------------|-----|--------|
| alasy:n:   | $\text{Pyr (abc) + Glu (defgh) \rightarrow Ala (abc) + aKG (defgh)}$                                                        | 0.0 | 1000.0 |
| sersyn:    | $3\text{PG (abc) + Glu (defgh) \rightarrow Ser (abc) + aKG (defgh)}$                                                        | 0.0 | 1000.0 |
| glysyn.f:  | $\text{Ser (abc) \rightarrow Gly (ab) + MEETHF (c)}$                                                                        | 0.0 | 1000.0 |
| glysyn.b:  | $\text{Gly (ab) + MEETHF (c) \rightarrow Ser (abc)}$                                                                        | 0.0 | 1000.0 |
| glydeg.f:  | $\text{Gly (ab) \rightarrow CO}_2\text{ (a) + MEETHF (b)}$                                                                  | 0.0 | 1000.0 |
| glydeg.b:  | $\text{CO}_2\text{ (a) + MEETHF (b) \rightarrow Gly (ab)}$                                                                  | 0.0 | 1000.0 |
| thrdeg:    | $\text{Thr (abcd) \rightarrow Gly (ab) + AcCoA (cd)}$                                                                       | 0.0 | 1000.0 |
| cyssyn:    | $\text{Ser (abc) + AcCoA (de) \rightarrow Cys (abc) + Ac (de)}$                                                             | 0.0 | 1000.0 |
| lldapsyn:  | $\text{Asp (abcd) + Pyr (efg) + Glu (hijkl) + SucCoA (mnop) \rightarrow LLDAP (abcdgfe) + aKG (hijkl) + Suc (mnop)}$        | 0.0 | 1000.0 |
| lyssyn:    | $\text{LLDAP (abcdefg) \rightarrow Lys (abcdef) + CO}_2\text{ (g)}$                                                         | 0.0 | 1000.0 |
| thrsyn:    | $\text{Asp (abcd) \rightarrow Thr (abcd)}$                                                                                  | 0.0 | 1000.0 |
| metsyn:    | $\text{Asp (abcd) + METHF (e) + Cys (fgh) + SucCoA (ijkl) \rightarrow Met (abcde) + Pyr (fgh) + Suc (ijkl)}$                | 0.0 | 1000.0 |
| valsyn:    | $\text{Pyr (abc) + Pyr (def) + Glu (ghijk) \rightarrow Val (abcef) + CO}_2\text{ (d) + aKG (ghijk)}$                        | 0.0 | 1000.0 |
| leusynI:   | $\text{Pyr (cde) + Pyr (fgh) + Glu (ijklm) \rightarrow Leu1 (dghe) + CO}_2\text{ (c) + CO}_2\text{ (f) + aKG (ijklm)}$      | 0.0 | 1000.0 |
| leusynII:  | $\text{AcCoA (ab) + Leu1 (dghe) \rightarrow Leu (abdghe)}$                                                                  | 0.0 | 1000.0 |
| ilesyn:    | $\text{Thr (abcd) + Pyr (efg) + Glu (hijkl) \rightarrow Ile (abfcdg) + CO}_2\text{ (e) + aKG (hijkl)}$                      | 0.0 | 1000.0 |
| phesynI:   | $\text{PEP (def) + E4P (ghij) + Glu (klmno) \rightarrow Phe1 (efghij) + CO}_2\text{ (d) + aKG (klmno)}$                     | 0.0 | 1000.0 |
| phesynII:  | $\text{PEP (abc) + Phe1 (efghij) \rightarrow Phe (abcefg hij)}$                                                             | 0.0 | 1000.0 |
| tyrsynI:   | $\text{PEP (def) + E4P (ghij) + Glu (klmno) \rightarrow Tyr1 (efghij) + CO}_2\text{ (d) + aKG (klmno)}$                     | 0.0 | 1000.0 |
| tyrsynII:  | $\text{PEP (abc) + Tyr1 (efghij) \rightarrow Tyr (abcefg hij)}$                                                             | 0.0 | 1000.0 |
| trpsynI:   | $\text{R5P (defgh) + E4P (lmno) + PEP (pqr) + Gln (stuvw) \rightarrow Trp1 (edlmno) + GAP (fgh) + Pyr (pqr) + Glu (stuvw)}$ | 0.0 | 1000.0 |
| trpsynII:  | $\text{PEP (ijk) + Trp1 (edlmno) \rightarrow Trp2 (edklmnoj) + CO}_2\text{ (i)}$                                            | 0.0 | 1000.0 |
| trpsynIII: | $\text{Ser (abc) + Trp2 (edklmnoj) \rightarrow Trp (abcdklmnoj)}$                                                           | 0.0 | 1000.0 |
| hissyn:    | $\text{R5P (abcde) + FTTHF (f) + Gln (ghijk) + Asp (lmno) \rightarrow His (edcbaf) + aKG (ghijk) + Fum (lmno)}$             | 0.0 | 1000.0 |

### ONE CARBON METABOLISM

| Reaction Name | Reaction Description                      | Flux LB | Flux UB |
|---------------|-------------------------------------------|---------|---------|
| methfsyn:     | $\text{MEETHF (a) \rightarrow METHF (a)}$ | 0.0     | 1000.0  |
| ftfsyn:       | $\text{MEETHF (a) \rightarrow FTTHF (a)}$ | 0.0     | 1000.0  |

### BIOMASS SYNTHESIS

| Reaction Name | Reaction Description | Flux LB | Flux UB |
|---------------|----------------------|---------|---------|
|---------------|----------------------|---------|---------|

|          |                                                                                                                                                                                                                                                                                                                                                                                                                                                                                                                                                                                                                                                                               |       |       |
|----------|-------------------------------------------------------------------------------------------------------------------------------------------------------------------------------------------------------------------------------------------------------------------------------------------------------------------------------------------------------------------------------------------------------------------------------------------------------------------------------------------------------------------------------------------------------------------------------------------------------------------------------------------------------------------------------|-------|-------|
| Biomass: | 0.488 Ala (abc) + 0.281 Arg (abcdef) + 0.229 Asn<br>(abcd) + 0.229 Asp (abcd) + 0.087 Cys (abc) + 0.250<br>Glu (abcde) + 0.250 Gln (abcde) + 0.582 Gly (ab) +<br>0.090 His (abcdef) + 0.276 Ile (abcdef) + 0.428 Leu<br>(abcdef) + 0.326 Lys (abcdef) + 0.146 Met (abcde) +<br>0.176 Phe (abcdefghi) + 0.210 Pro (abcde) + 0.205<br>Ser (abc) + 0.241 Thr (abcd) + 0.054 Trp<br>(abcdefghijk) + 0.131 Tyr (abcdefghi) + 0.402 Val<br>(abcde) + 0.205 G6P (abcdef) + 0.071 F6P (abcdef) +<br>0.754 R5P (abcde) + 0.129 GAP (abc) + 0.619 3PG<br>(abc) + 0.051 PEP (abc) + 0.083 Pyr (abc) + 2.510<br>AcCoA (ab) + 0.087 aKG (abcde) + 0.340 OAA (abcd)<br>+ 0.443 MEETHF (a) → | 0.015 | 0.015 |
|----------|-------------------------------------------------------------------------------------------------------------------------------------------------------------------------------------------------------------------------------------------------------------------------------------------------------------------------------------------------------------------------------------------------------------------------------------------------------------------------------------------------------------------------------------------------------------------------------------------------------------------------------------------------------------------------------|-------|-------|

23 **Results**

24 The *E. coli* model was fit to simulated liquid chromatography-tandem mass spectrometry (LC-MS/MS)  
 25 data with random noise added to the measurements to simulate experimental error. This data is listed in  
 26 **S1 Data**. The simulated LC-MS/MS data includes the parent and daughter ions described by Rühl et al  
 27 [2].

28 All pool sizes were constrained by a lower bound of 0.001 and an upper bound of 10.0 when fitting the  
 29 model. The time domain was discretized by assigning time nodes at values of 0.0, 0.015, 0.045, 0.150,  
 30 0.400, 1.100, and 3.100. The 3<sup>rd</sup>-order Radau IIA collocation method was used initially to identify the  
 31 optimum, followed by the 9<sup>th</sup>-order Radau IIA method for refining the solution.

32

**GLYCOLYSIS**

| Reaction Name | Actual Flux | Actual Exchange | Predicted Flux | SD    | Predicted Exchange | SD      |
|---------------|-------------|-----------------|----------------|-------|--------------------|---------|
| gl-in:        | 1.000       |                 | 1.000          | 0.000 |                    |         |
| gl-1:         | 1.000       |                 | 1.000          | 0.000 |                    |         |
| gl-2:         | 0.737       |                 | 0.735          | 0.029 |                    |         |
| gl-3:         | 0.875       | 0.018           | 0.872          | 0.034 | 0.030              | 0.012   |
| gl-4:         | 0.875       | 79.945          | 0.872          | 0.034 | 49.635             | 352.884 |
| gl-5:         | 0.875       | 398.604         | 0.872          | 0.034 | 999.128            | 456.952 |
| gl-6:         | 1.851       | 387.675         | 1.847          | 0.034 | 998.153            | 303.376 |
| gl-7:         | 1.851       | 177.631         | 1.847          | 0.034 | 0.000              | 290.339 |
| gl-8:         | 1.825       | 16.921          | 1.827          | 0.034 | 998.173            | 479.101 |
| gl-9:         | 1.652       |                 | 1.667          | 0.043 |                    |         |

**PENTOSE PHOSPHATE PATHWAY**

| Reaction Name | Actual Flux | Actual Exchange | Predicted Flux | SD    | Predicted Exchange | SD    |
|---------------|-------------|-----------------|----------------|-------|--------------------|-------|
| pp-1:         | 0.260       |                 | 0.262          | 0.029 |                    |       |
| pp-2:         | 0.226       |                 | 0.222          | 0.010 |                    |       |
| pp-3:         | 0.086       | 3.213           | 0.085          | 0.003 | 3.285              | 1.189 |
| pp-4:         | 0.140       | 1.316           | 0.137          | 0.007 | 1.324              | 0.107 |
| pp-5:         | 0.072       | 0.393           | 0.071          | 0.003 | 0.386              | 0.020 |
| pp-6:         | 0.072       | 0.000           | 0.071          | 0.003 | 0.001              | 0.001 |
| pp-7:         | 0.067       | 0.000           | 0.066          | 0.003 | 0.000              | 0.002 |

**ED PATHWAY**

| Reaction Name | Actual Flux | Actual Exchange | Predicted Flux | SD    | Predicted Exchange | SD |
|---------------|-------------|-----------------|----------------|-------|--------------------|----|
| ed-1:         | 0.035       |                 | 0.040          | 0.037 |                    |    |
| ed-2:         | 0.035       |                 | 0.040          | 0.037 |                    |    |

**TCA CYCLE**

| Reaction Name | Actual Flux | Actual Exchange | Predicted Flux | SD    | Predicted Exchange | SD |
|---------------|-------------|-----------------|----------------|-------|--------------------|----|
| pd:           | 1.785       |                 | 1.778          | 0.007 |                    |    |
| tc-1:         | 0.096       |                 | 0.089          | 0.011 |                    |    |
| tc-2:         | 0.096       |                 | 0.089          | 0.011 |                    |    |
| tc-3:         | 0.077       |                 | 0.072          | 0.010 |                    |    |
| tc-4:         | 0.060       |                 | 0.056          | 0.010 |                    |    |

|       |        |          |        |       |         |         |
|-------|--------|----------|--------|-------|---------|---------|
| tc-5: | 0.053  |          | 0.049  | 0.010 |         |         |
| tc-6: | 0.080  | 646.735  | 0.073  | 0.011 | 20.146  | 493.971 |
| tc-7: | 0.086  | 0.419    | 0.078  | 0.011 | 0.424   | 0.092   |
| tc-8: | -0.033 | 1000.000 | -0.016 | 0.014 | 111.089 | 475.008 |

#### ANAPLEROTIC/CATAPLEROTIC REACTIONS

| Reaction Name | Actual Flux | Actual Exchange | Predicted Flux | SD    | Predicted Exchange | SD    |
|---------------|-------------|-----------------|----------------|-------|--------------------|-------|
| me:           | 0.138       |                 | 0.111          | 0.018 |                    |       |
| an:           | 0.161       | 0.000           | 0.148          | 0.020 | 0.000              | 0.010 |

#### ACETATE SYNTHESIS

| Reaction Name | Actual Flux | Actual Exchange | Predicted Flux | SD    | Predicted Exchange | SD |
|---------------|-------------|-----------------|----------------|-------|--------------------|----|
| ac:           | 1.618       |                 | 1.631          | 0.009 |                    |    |

#### GLYOXYLATE CYCLE

| Reaction Name | Actual Flux | Actual Exchange | Predicted Flux | SD    | Predicted Exchange | SD |
|---------------|-------------|-----------------|----------------|-------|--------------------|----|
| gx-1:         | 0.019       |                 | 0.017          | 0.003 |                    |    |
| gx-2:         | 0.019       |                 | 0.017          | 0.003 |                    |    |

#### EXCHANGE FLUXES

| Reaction Name | Actual Flux | Actual Exchange | Predicted Flux | SD    | Predicted Exchange | SD    |
|---------------|-------------|-----------------|----------------|-------|--------------------|-------|
| co2-in:       | -2.154      | 0.524           | -2.126         | 0.018 | 0.585              | 0.095 |
| ac-out:       | 1.625       |                 | 1.639          | 0.009 |                    |       |

#### AMINO ACID SYNTHESIS

| Reaction Name | Actual Flux | Actual Exchange | Predicted Flux | SD    | Predicted Exchange | SD      |
|---------------|-------------|-----------------|----------------|-------|--------------------|---------|
| glusyn:       | 0.098       |                 | 0.103          | 0.007 |                    |         |
| glnsyn:       | 0.010       |                 | 0.010          | 0.000 |                    |         |
| prosyn:       | 0.003       |                 | 0.003          | 0.000 |                    |         |
| argsyn:       | 0.004       |                 | 0.004          | 0.000 |                    |         |
| aspsyn:       | 0.027       |                 | 0.038          | 0.013 |                    |         |
| asnsyn:       | 0.003       |                 | 0.003          | 0.000 |                    |         |
| alasy:        | 0.007       |                 | 0.007          | 0.000 |                    |         |
| sersyn:       | 0.017       |                 | 0.012          | 0.007 |                    |         |
| glysyn:       | 0.009       | 0.005           | 0.004          | 0.007 | 999.996            | 280.146 |
| glydeg:       | 0.001       | 0.000           | 0.006          | 0.007 | 999.994            | 338.953 |
| thrdeg:       | 0.000       |                 | 0.011          | 0.013 |                    |         |
| cyssyn:       | 0.003       |                 | 0.003          | 0.000 |                    |         |
| lldapsyn:     | 0.005       |                 | 0.005          | 0.000 |                    |         |
| lyssyn:       | 0.005       |                 | 0.005          | 0.000 |                    |         |
| thrsyn:       | 0.008       |                 | 0.018          | 0.013 |                    |         |
| metsyn:       | 0.002       |                 | 0.002          | 0.000 |                    |         |
| valsyn:       | 0.006       |                 | 0.006          | 0.000 |                    |         |
| leusynI:      | 0.006       |                 | 0.006          | 0.000 |                    |         |
| leusynII:     | 0.006       |                 | 0.006          | 0.000 |                    |         |



|            |       |  |       |       |
|------------|-------|--|-------|-------|
| ilesyn:    | 0.004 |  | 0.004 | 0.000 |
| phesynI:   | 0.003 |  | 0.003 | 0.000 |
| phesynII:  | 0.003 |  | 0.003 | 0.000 |
| tyrsynI:   | 0.002 |  | 0.002 | 0.000 |
| tyrsynII:  | 0.002 |  | 0.002 | 0.000 |
| trpsynI:   | 0.001 |  | 0.001 | 0.000 |
| trpsynII:  | 0.001 |  | 0.001 | 0.000 |
| trpsynIII: | 0.001 |  | 0.001 | 0.000 |
| hissyn:    | 0.001 |  | 0.001 | 0.000 |

**ONE CARBON METABOLISM**

| Reaction Name | Actual Flux | Actual Exchange | Predicted Flux | SD    | Predicted Exchange | SD |
|---------------|-------------|-----------------|----------------|-------|--------------------|----|
| methfsyn:     | 0.002       |                 | 0.002          | 0.000 |                    |    |
| ftfsyn:       | 0.001       |                 | 0.001          | 0.000 |                    |    |

**BIOMASS SYNTHESIS**

| Reaction Name | Actual Flux | Actual Exchange | Predicted Flux | SD    | Predicted Exchange | SD |
|---------------|-------------|-----------------|----------------|-------|--------------------|----|
| Biomass:      | 0.015       |                 | 0.015          | 0.000 |                    |    |

33

34

| Pool Name | Actual Pool Size | Predicted Pool Size | SD    |
|-----------|------------------|---------------------|-------|
| Glc       | 0.096            | 2.700               | 0.212 |
| G6P       | 0.085            | 0.035               | 0.009 |
| F6P       | 0.061            | 0.066               | 0.007 |
| FBP       | 0.089            | 0.171               | 0.059 |
| DHAP      | 0.012            | 0.001               | 0.097 |
| GAP       | 0.006            | 0.001               | 0.034 |
| BPG       | 0.075            | 0.001               | 0.009 |
| 3PG       | 0.032            | 0.015               | 0.051 |
| PEP       | 0.000            | 0.001               | 0.026 |
| 6PG       | 0.050            | 0.087               | 0.010 |
| Ru5P      | 0.086            | 0.001               | 0.010 |
| R5P       | 0.076            | 0.021               | 0.011 |
| X5P       | 0.091            | 0.079               | 0.009 |
| S7P       | 0.043            | 0.089               | 0.005 |
| E4P       | 0.065            | 0.048               | 0.008 |
| KDPG      | 0.008            | 0.033               | 1.955 |
| Pyr       | 0.059            | 0.031               | 0.012 |
| OAA       | 0.045            | 0.022               | 0.047 |
| AcCoA     | 0.041            | 0.087               | 0.026 |
| Cit       | 0.057            | 0.080               | 0.010 |
| iCit      | 0.025            | 0.042               | 0.006 |
| aKG       | 0.041            | 0.024               | 0.007 |

|        |       |        |       |
|--------|-------|--------|-------|
| SucCoA | 0.048 | 0.066  | 0.025 |
| Suc    | 0.029 | 0.105  | 0.030 |
| Fum    | 0.087 | 0.001  | 0.020 |
| Mal    | 0.074 | 0.079  | 0.049 |
| CO2    | 0.034 | 0.001  | 0.037 |
| Gox    | 0.040 | 10.000 | 4.673 |
| Ac     | 0.048 | 0.086  | 0.069 |
| Glu    | 0.082 | 0.053  | 0.004 |
| Gln    | 0.025 | 0.001  | 1.468 |
| Asp    | 0.048 | 0.045  | 0.016 |
| Ser    | 0.014 | 0.001  | 1.330 |
| Gly    | 0.009 | 0.001  | 1.307 |
| MEETHF | 0.016 | 10.000 | 3.896 |
| Thr    | 0.078 | 10.000 | 3.722 |
| LLDAP  | 0.100 | 10.000 | 4.854 |
| METHF  | 0.090 | 0.768  | 0.367 |
| Cys    | 0.012 | 0.001  | 3.956 |
| Leu1   | 0.030 | 9.948  | 0.151 |
| Phe1   | 0.041 | 0.491  | 1.562 |
| Tyr1   | 0.031 | 6.652  | 0.000 |
| Trp1   | 0.015 | 8.508  | 1.397 |
| Trp2   | 0.009 | 1.375  | 1.119 |
| FTHF   | 0.091 | 0.001  | 0.254 |
| Ala    | 0.000 | 4.909  | 0.000 |
| Arg    | 0.061 | 0.885  | 0.664 |
| Asn    | 0.085 | 8.010  | 0.000 |
| His    | 0.081 | 1.254  | 1.396 |
| Ile    | 0.076 | 0.001  | 0.045 |
| Leu    | 0.020 | 6.674  | 0.345 |
| Lys    | 0.005 | 6.788  | 0.102 |
| Met    | 0.034 | 4.390  | 0.000 |
| Phe    | 0.017 | 8.980  | 0.414 |
| Pro    | 0.008 | 6.372  | 0.311 |
| Trp    | 0.078 | 0.001  | 0.004 |
| Tyr    | 0.027 | 3.202  | 0.000 |
| Val    | 0.046 | 2.173  | 0.688 |

36 *Model Fits to Simulated Data*

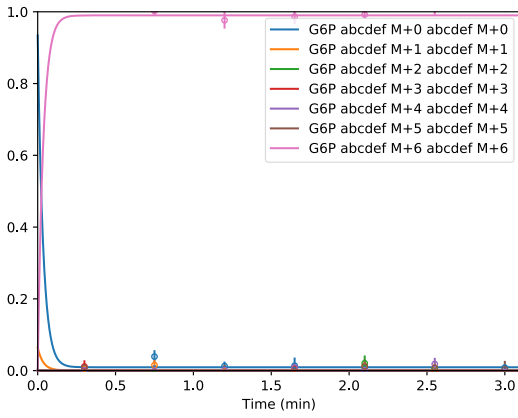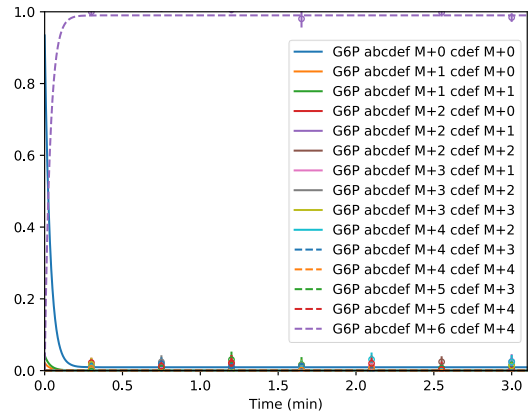

37

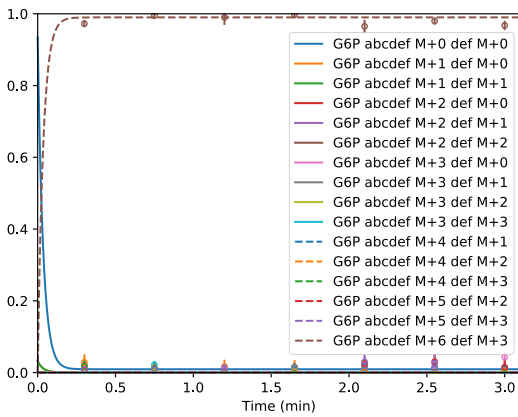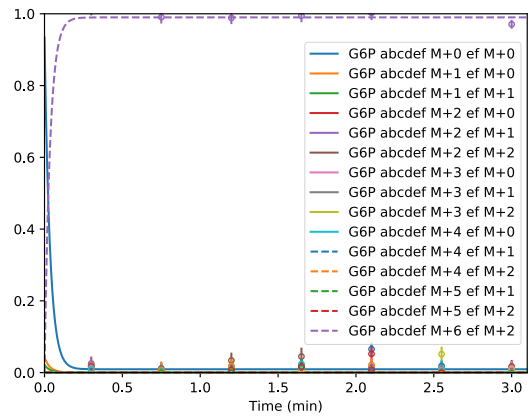

38

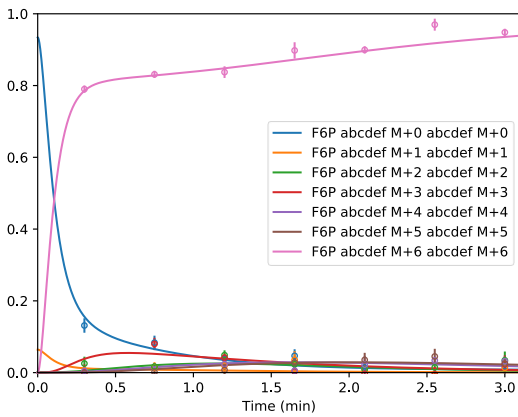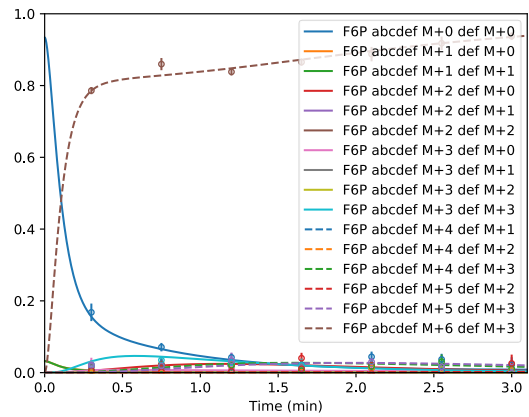

39

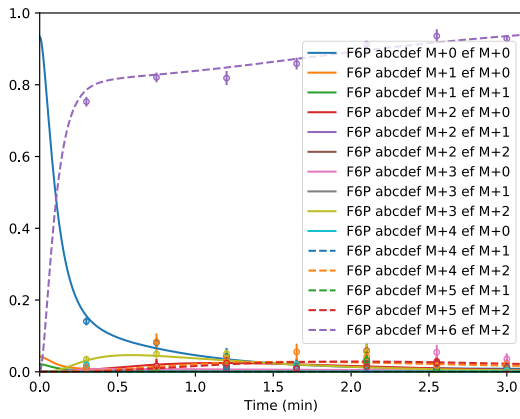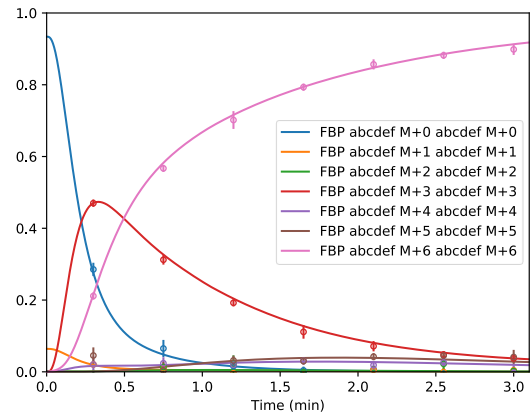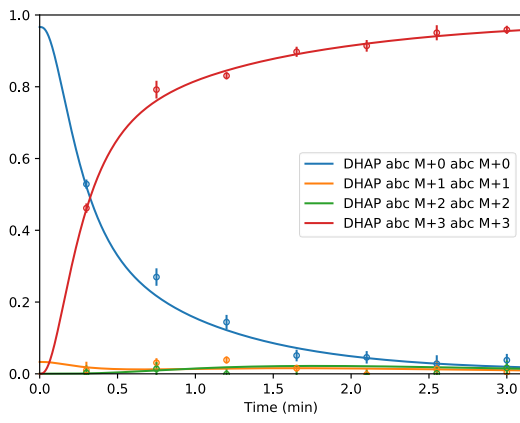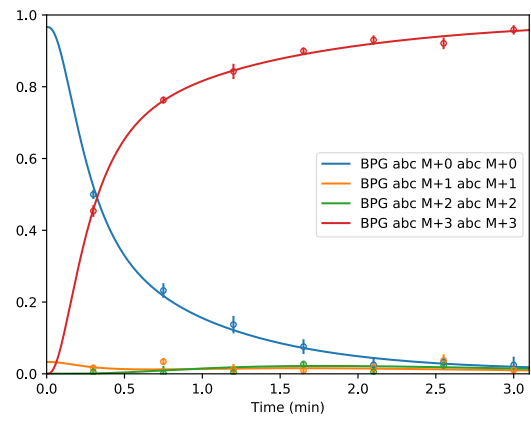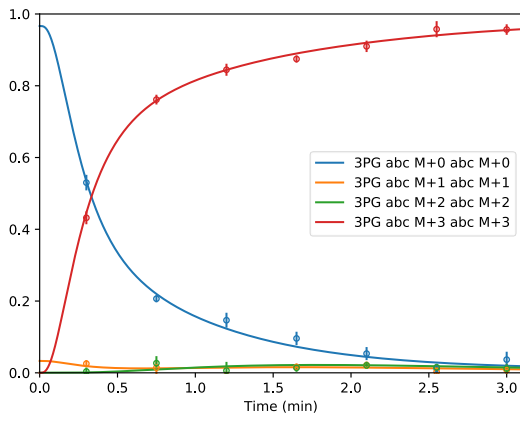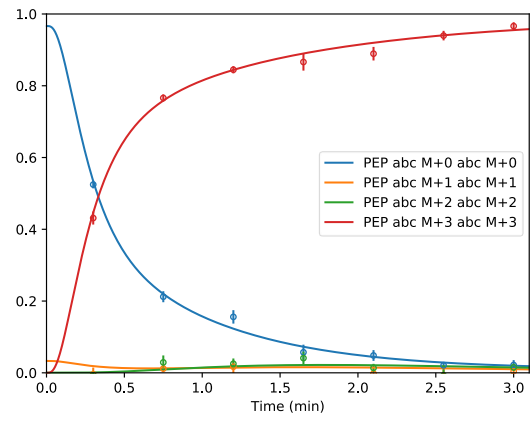

43

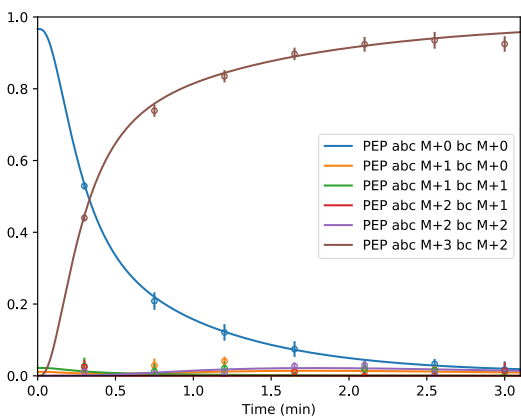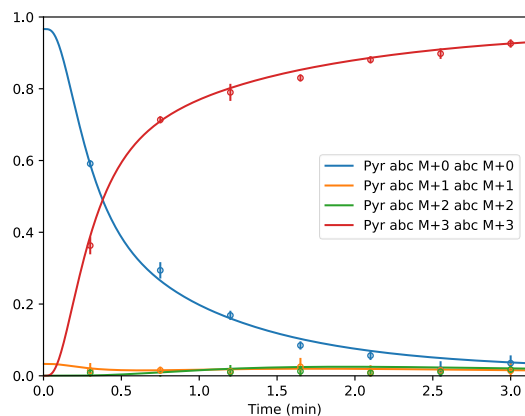

44

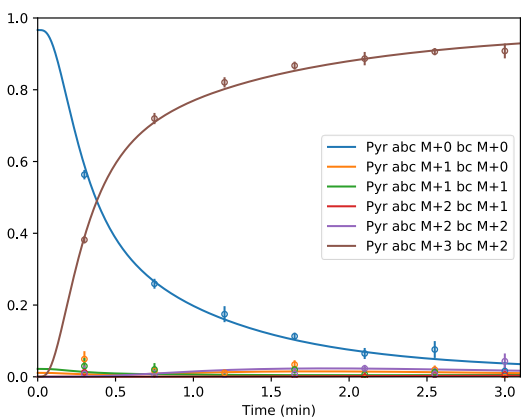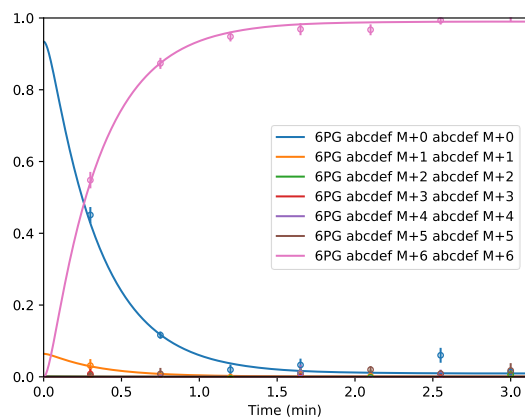

45

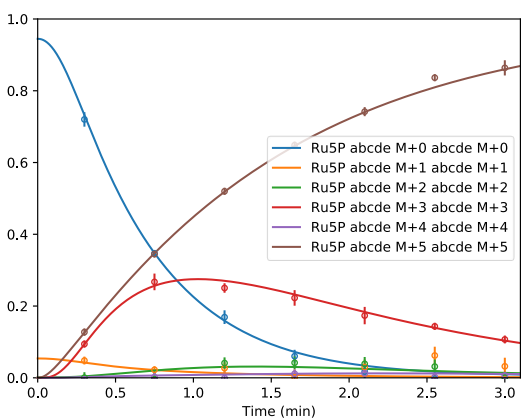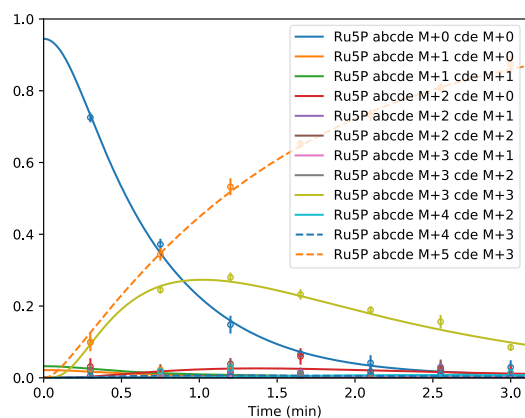

46

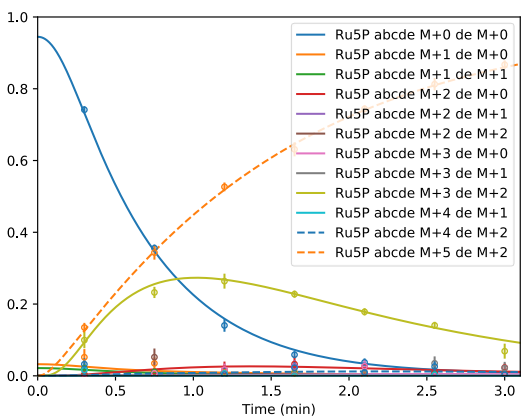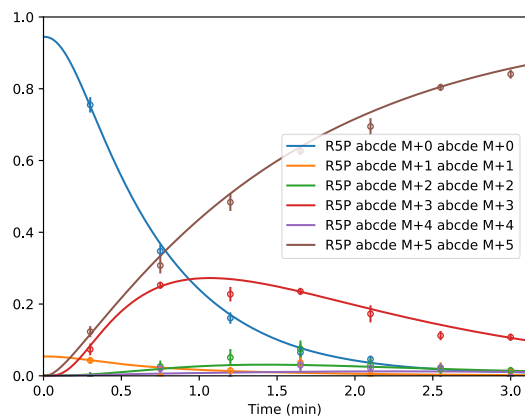

47

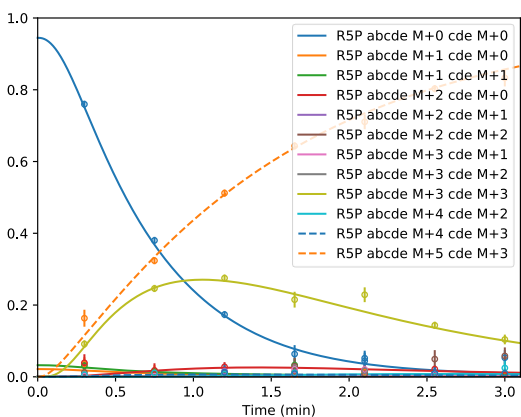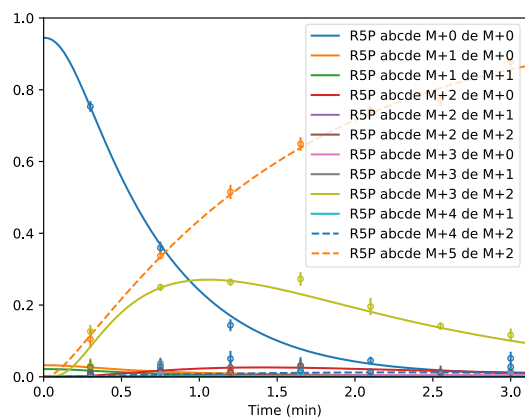

48

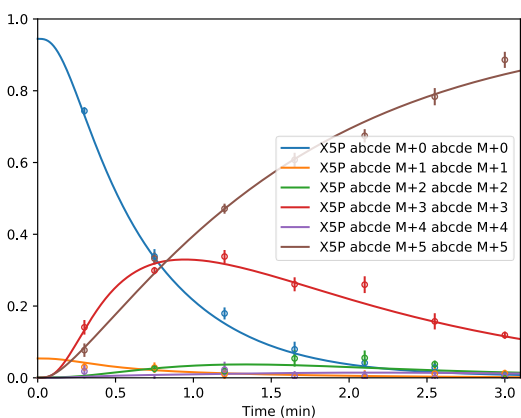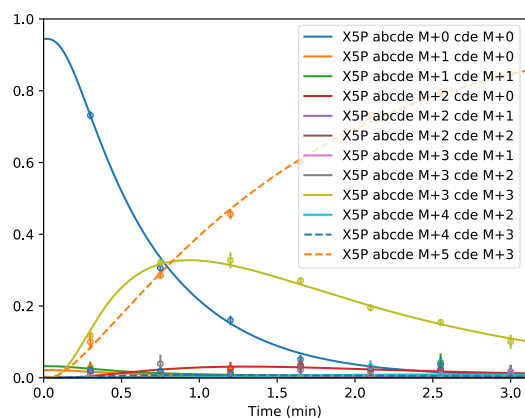

49

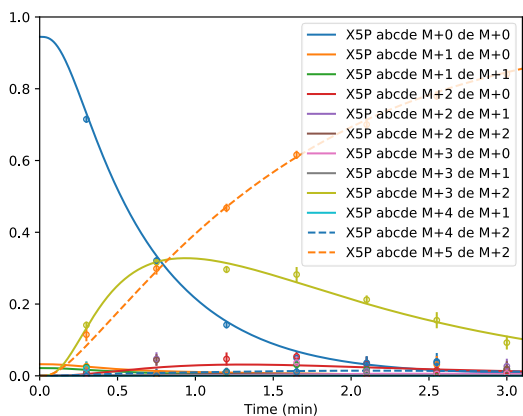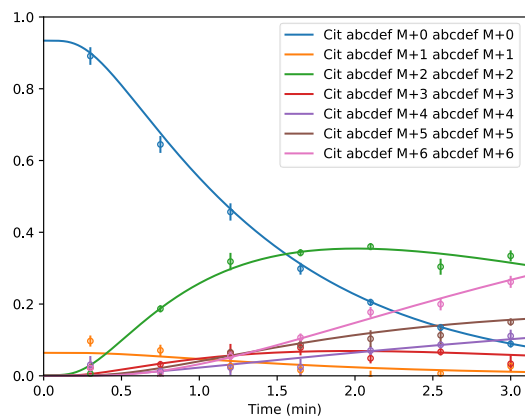

50

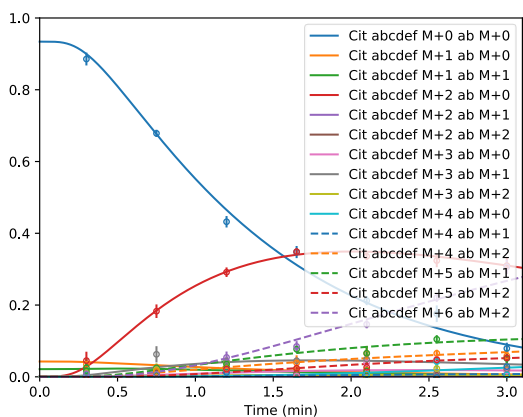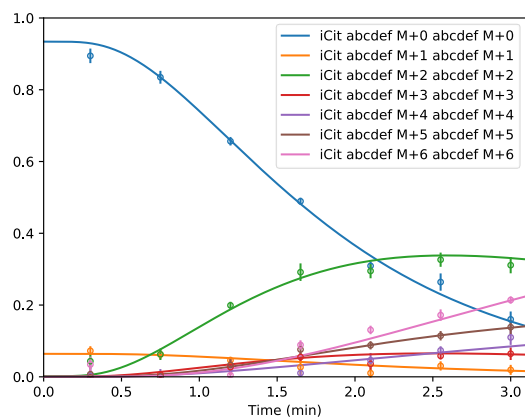

51

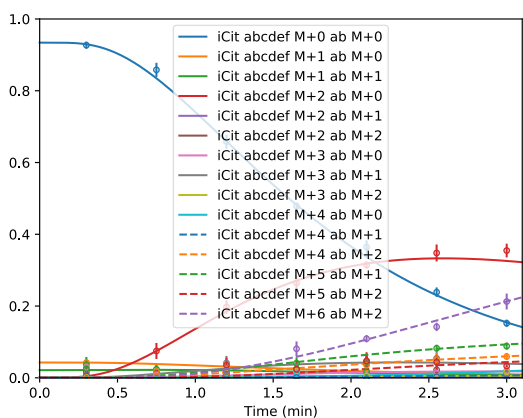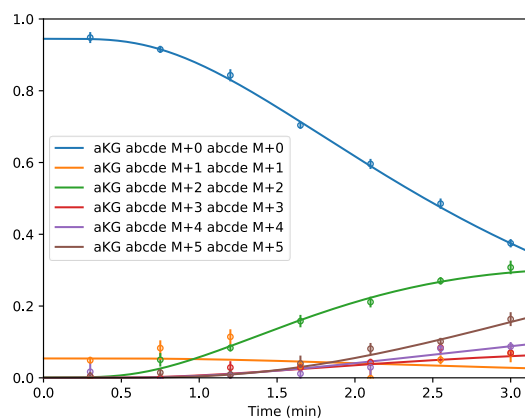

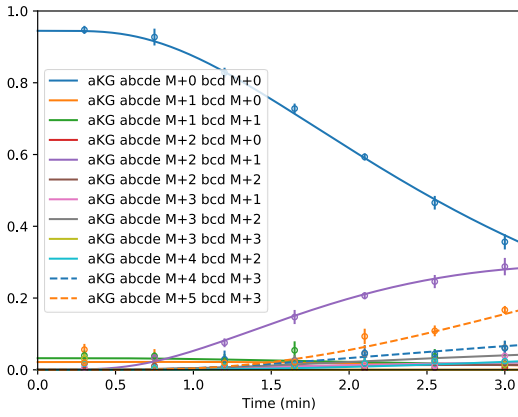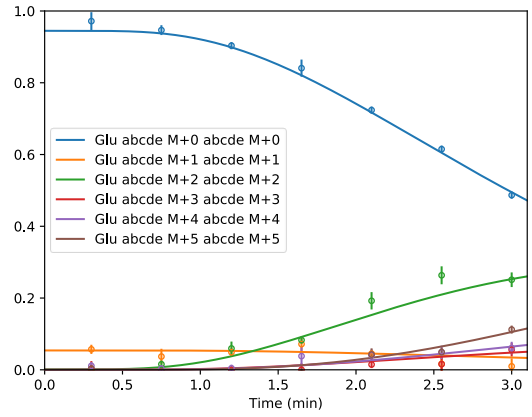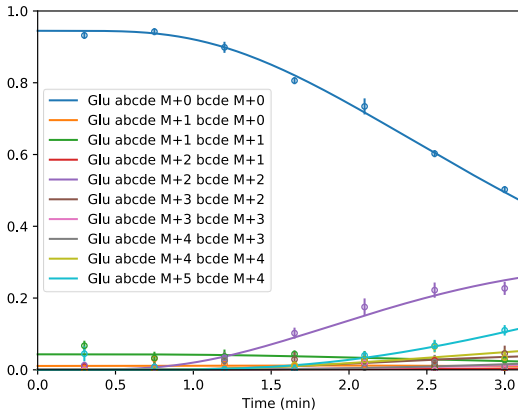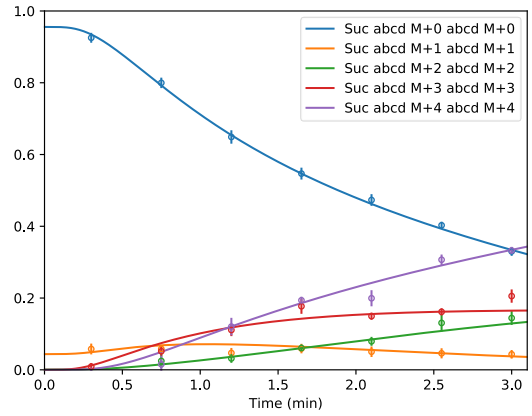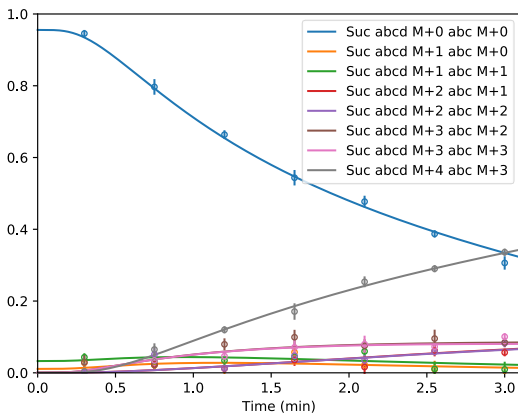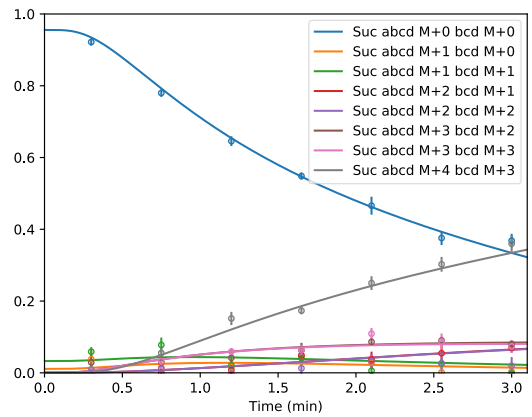



55

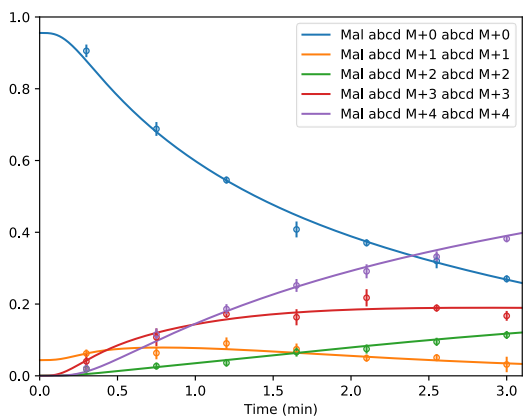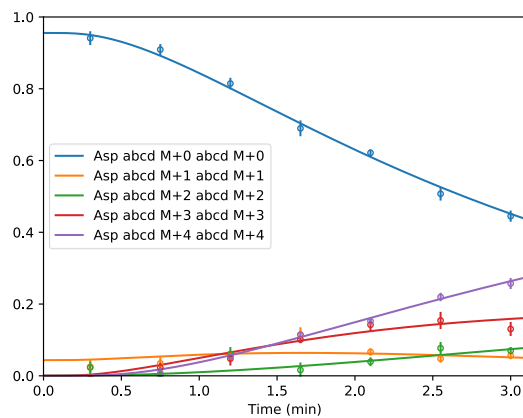

56

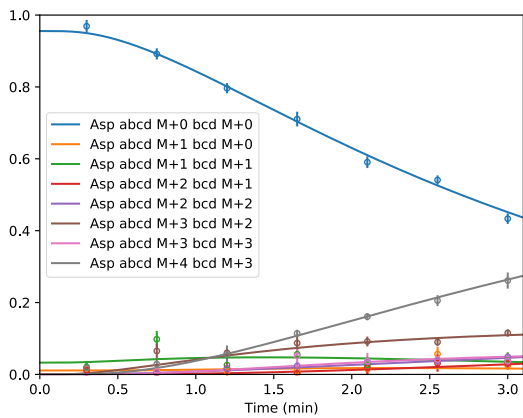

57 **References**

- 58 1. Young JD, Walther JL, Antoniewicz MR, Yoo H, Stephanopoulos G. An elementary metabolite unit  
59 (EMU) based method of isotopically nonstationary flux analysis. *Biotechnol Bioeng.* 2008;99: 686–  
60 699. doi:10/crmdfw
- 61 2. Rühl M, Rupp B, Nöh K, Wiechert W, Sauer U, Zamboni N. Collisional fragmentation of central  
62 carbon metabolites in LC-MS/MS increases precision of <sup>13</sup>C metabolic flux analysis. *Biotechnol*  
63 *Bioeng.* 2012;109: 763–771. doi:10/bt7qxt

64
