# Supplementary material for: Isotope-assisted metabolic flux analysis as an equality-constrained nonlinear program for improved scalability and robustness
Source: PubMed Central journal article supplement (PMC8947808; doi:10.1371/journal.pcbi.1009831), 2022-03-24
Supplement: pcbi.1009831.s006.pdf [file pcbi.1009831.s006.pdf]

## List of Symbols

| Symbol                     | Description                                                                                                       |
|----------------------------|-------------------------------------------------------------------------------------------------------------------|
| $z$                        | Objective function value                                                                                          |
| $m_n^{meas}$               | Value of isotope labeling measurement $n$                                                                         |
| $m_n$                      | Value of simulated isotope labeling measurement $n$                                                               |
| $\sigma_n$                 | Standard deviation of isotope labeling measurement $n$                                                            |
| $v_r^{meas}$               | Value of flux measurement $r$                                                                                     |
| $v_r$                      | Value of simulated flux measurement $r$                                                                           |
| $\sigma_{v,r}$             | Standard deviation of flux measurement $r$                                                                        |
| $x_i$                      | Cumomer with index $i$                                                                                            |
| $Q_{r kj} x_i x_j$         | Bimolecular reactions $r$ producing $x_k$ from $x_i$ and $x_j$                                                    |
| $P_{r kj} x_i x_j$         | Unimolecular production and consumption of $x_k$                                                                  |
| $P_{r kj}^{inp} x_j^{inp}$ | Input of fed isotopically labeled compound(s) into the network                                                    |
| <b>S</b>                   | Stoichiometric matrix                                                                                             |
| $R_{wr}$                   | Element of the flux linear inequality constraint matrix with indices $w$ and $r$                                  |
| $b_w$                      | Flux inequality constraint bound with index $w$                                                                   |
| $h_c^{frag}$               | Fragment scaling factor for measured fragment with index $c$                                                      |
| $h_n^{meas}$               | Measurement scaling factor or measurement with index $n$                                                          |
| $h_{c\mu}^{frag}$          | Fragment scaling factor for measured fragment with index $c$ at measurement time $\mu$                            |
| $h_{n\mu}^{meas}$          | Measurement scaling factor for measurement with index $n$ at measurement time $\mu$                               |
| <b>U</b>                   | Matrix used to constrain each $h_{n\mu}^{meas}$ to equal its respective fragment scaling factor $h_{c\mu}^{frag}$ |
| <b>M</b>                   | Mapping matrix from cumomers to isotope labeling measurements                                                     |
| $x_u$                      | Zero-order cumomers (cumomers with indices $u$ )                                                                  |
| $v_r$                      | Flux with index $r$                                                                                               |
| $v_r^{lb}$                 | Lower bound of flux with index $r$                                                                                |
| $v_r^{ub}$                 | Upper bound of flux with index $r$                                                                                |
| $p_k$                      | Pool size of metabolite corresponding to cumomer $k$                                                              |
| $a_{\alpha\beta}$          | Element of the Runge-Kutta matrix with indices $\alpha$ and $\beta$                                               |
| $b_\alpha$                 | Runge-Kutta weight with index $\alpha$                                                                            |
| $c_\alpha$                 | Collocation node with index $\alpha$ on the interval [0,1]                                                        |
| $h_\gamma$                 | Width of time interval $\gamma$ : $h_\gamma = t_\gamma - t_{\gamma-1}$                                            |
| $x_{\gamma i}$             | Value of cumomer with index $i$ at time point $\gamma$                                                            |

|                       |                                                                                                 |
|-----------------------|-------------------------------------------------------------------------------------------------|
| $x_{0i}$              | Initial conditions of cumomer with index $i$                                                    |
| $k_{\alpha\gamma i}$  | Basis coefficient with index $\alpha$ used for approximating $x_i(t)$ in time interval $\gamma$ |
| $K_{\alpha\gamma i}$  | Intermediate variable used to split the Runge-Kutta equations                                   |
| $\ell_{\alpha}(\tau)$ | Lagrange polynomial with index $\alpha$                                                         |
| $B_{\alpha}(\tau)$    | Basis function with index $\alpha$ for the collocation method                                   |
| $m_{n\mu}^{meas}$     | Value of isotope labeling measurement $n$ at time point $\mu$                                   |
| $m_{n\mu}$            | Value of simulated isotope labeling measurement $n$ at time point $\mu$                         |
| $p_m^{met,meas}$      | Value of metabolite pool size measurement $m$                                                   |
| $p_m^{met}$           | Value of simulated metabolite pool size $m$                                                     |
| <b>D</b>              | Matrix used to constrain each $p_k$ to equal its respective metabolite pool size $p_m^{met}$    |
| $p_m^{met,lb}$        | Lower bound of metabolite pool size $p_m^{met}$                                                 |
| $p_m^{met,ub}$        | Upper bound of metabolite pool size $p_m^{met}$                                                 |
