# Supplementary material for: Isotope-assisted metabolic flux analysis as an equality-constrained nonlinear program for improved scalability and robustness
Source: PubMed Central journal article supplement (PMC8947808; doi:10.1371/journal.pcbi.1009831), 2022-03-24

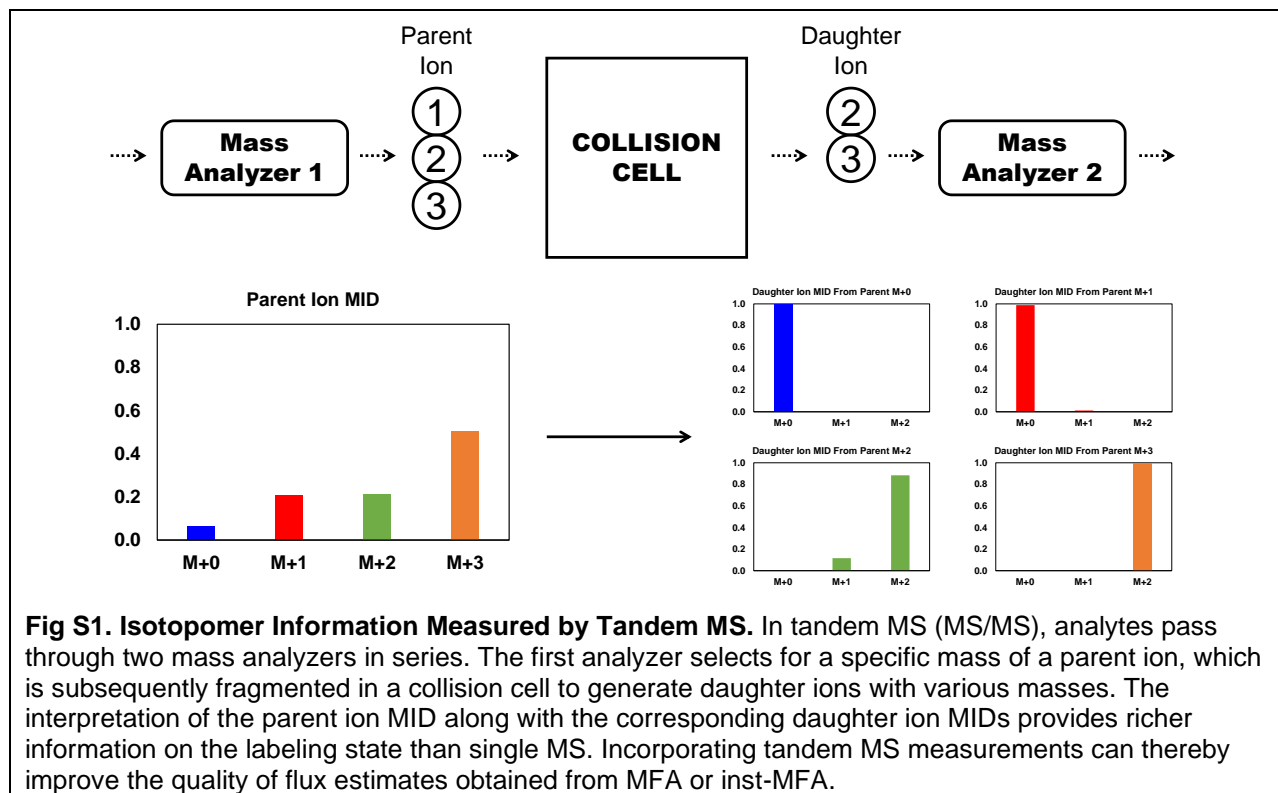

Supplement: pcbi.1009831.s007.pdf [file pcbi.1009831.s007.pdf]
